# Supplementary material for: DES-N-doped oxygenated carbon dot colloidal solutions for light harvesting and bio-imaging applications
Source: Royal Society of Chemistry journal article supplement (doi:10.1039/d0ma00621a), 2020-01-01
Supplement: d0ma00621a1.pdf [file d0ma00621a1.pdf]

## Supporting information for

### **DES-N-Doped Oxygenated Carbon Dots Colloidal Solutions for Light Harvesting and Bio-imaging Applications**

*Krishnaiah Damarla,<sup>†,§</sup> Sanjay Mehra,<sup>†,§</sup> Tejwant Singh Kang,<sup>‡</sup> Sonam Yadav,<sup>†,§</sup> Avinash Mishra<sup>†,§</sup> and Arvind Kumar<sup>†,§,\*</sup>*

<sup>†</sup>CSIR-Central Salt and Marine Chemicals Research Institute, G. B. Marg Bhavnagar-364002, Gujarat, India.

<sup>§</sup>Academy of Scientific and Innovative Research (AcSIR), Ghaziabad-201002, India

<sup>‡</sup>Department of Chemistry, UGC-centre for Advance Studies – II, Guru Nanak Dev University, Amritsar, 143005, India.

Corresponding Author e-mail: mailme\_arvind@yahoo.com ; arvind@csmcri.res.in Tel.: +91-278-2567039. Fax: +91-278-2567562.

Number of pages: 14

Number of figures: 11

Number of tables: 01

## Table of contents

|                                                                                                                                                                                                               |     |
|---------------------------------------------------------------------------------------------------------------------------------------------------------------------------------------------------------------|-----|
| <b>Fig. S1</b> <sup>1</sup> H NMR spectra of [Cho][Ola].                                                                                                                                                      | S3  |
| <b>Fig. S2</b> Plot shows the Surface tension of [Cho][Ola] in aqueous system.                                                                                                                                | S4  |
| <b>Fig. S3</b> Plot shows the 2D NMR NOESY spectra of [Cho][Ola] in choline chloride-ethylene glycol (1:2 mole ratio) deep eutectic solvent (DES).                                                            | S5  |
| <b>Fig. S4</b> (a) FT-IR spectra of (A) [Cho][Ola]-DES colloidal solutions and (B) N doped CDs-[Cho][Ola] -DES colloidal solutions, and (b) Raman spectra of N doped CDs-[Cho][Ola] -DES colloidal solutions. | S6  |
| <b>Fig. S5</b> Fluorescence spectra, of N doped CDs-[Cho][Ola]-DES colloidal solution.                                                                                                                        | S6  |
| <b>Fig. S6</b> Photographs of blue emission from N doped CDs dispersed in toluene.                                                                                                                            | S7  |
| <b>Fig. S7</b> TrPL life time IRF spectra.                                                                                                                                                                    | S8  |
| <b>Table S1</b> Comparison of quantum yields of CDs vis. a vis/ method of preparation.                                                                                                                        | S9  |
| <b>Fig. S8</b> Fluorescence microscopic images of <i>Escherichia coli</i> with the N-doped carbon dots under and through green filter.                                                                        | S10 |
| <b>Fig. S9</b> Fluorescence microscopic images of <i>Bacillus cereus</i> , labeled with the N-doped carbon dots under and through green filter.                                                               | S11 |
| <b>Fig. S10</b> Fluorescence microscopic images of <i>Vibrio owensii</i> , labeled with the N-doped carbon dots under and through green filter.                                                               | S12 |
| <b>Fig. S11</b> Fluorescence microscopic images of <i>Vibrio alginolyticus</i> of OD <sub>600</sub> 0.6, labeled with the N-doped carbon dots under and through green filter.                                 | S13 |

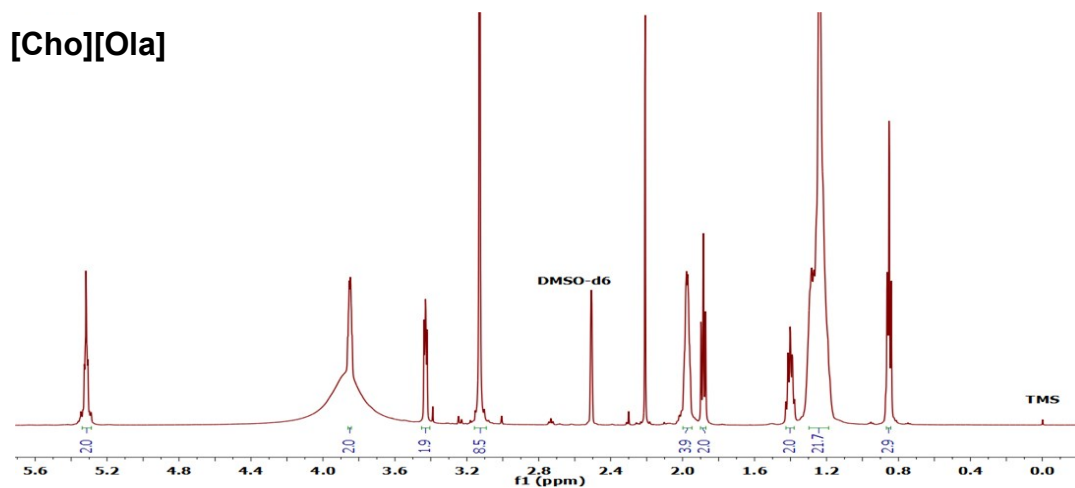

**Fig. S1**  $^1\text{H}$  NMR spectra of [Cho][Ola].

*Choline Oleate, [Cho][Ola]:*  $^1\text{H}$ -NMR; 600MHz, DMSO-d6,  $\delta_{\text{H}}$  0.9 (t, 3H), 1.3 (m, 20H), 1.4 (q, 2H), 1.9 (t, 2H), 2.0 (q, 4H), 3.1 (s, 9H), 3.4 (t, 2H), 3.9 (m, 3H), 5.3 (d, 2H); ESI-MS:  $[\text{C}_5\text{H}_{14}\text{NO}]^+$  m/z:104.10,  $[\text{C}_{18}\text{H}_{33}\text{O}_2]^-$  m/z = 285.6.

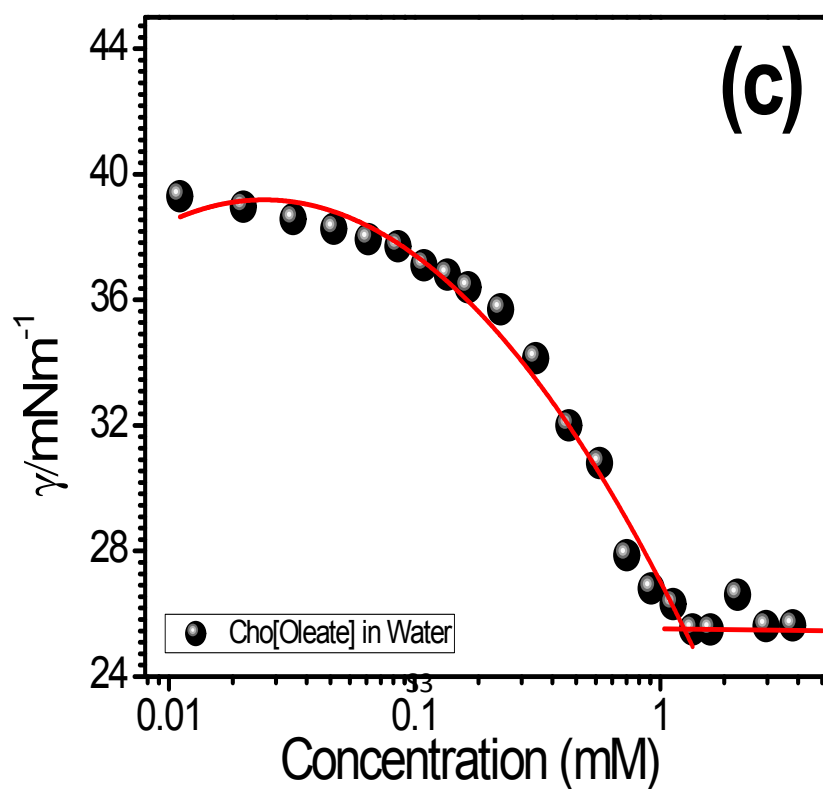

**Fig. S2** Plot shows the Surface tension of [Cho][Ola] in aqueous system.

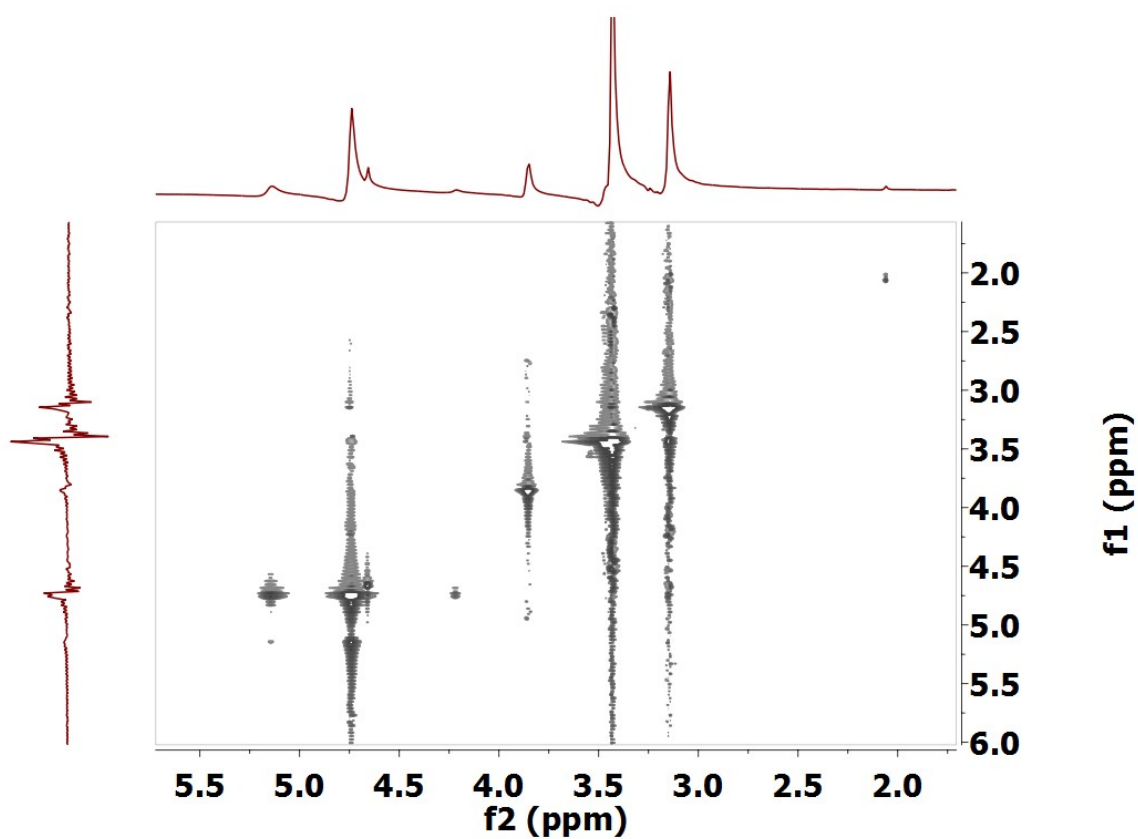

**Fig. S3** 2D NMR NOESY spectra spectra of [Cho][Ola] in choline chloride-ethylene glycol (1:2 mole ratio) deep eutectic solvent (DES).

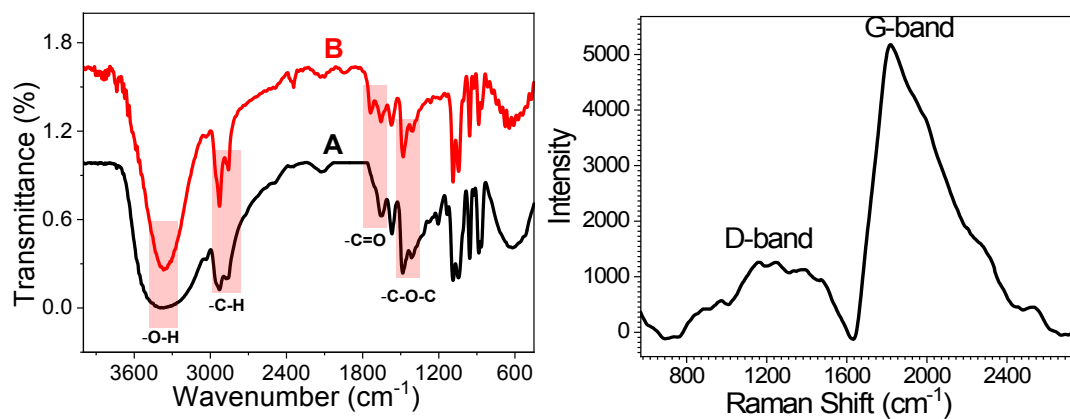

**Fig. S4** (a) FT-IR spectra of (A) [Cho][Ola]-DES colloidal solutions and (B) N doped CDs-[Cho][Ola]-DES colloidal solutions, and (b) Raman spectra of N doped CDs-[Cho][Ola]-DES colloidal solutions.

**Fig. S5** Fluorescence spectra, of N doped CDs-[Cho][Ola]-DES colloidal solution.

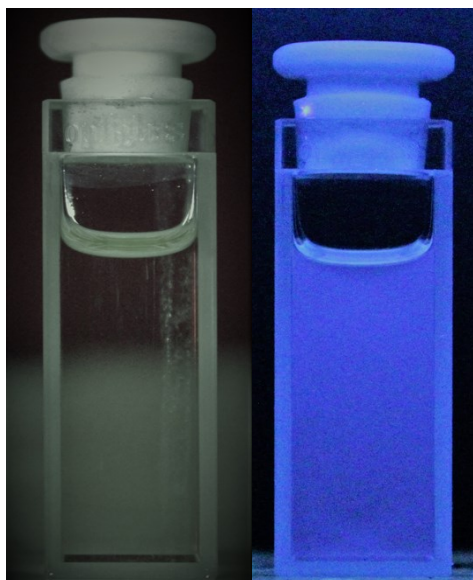

**Fig. S6** Photographs of blue emission from N doped CDs dispersed in toluene.

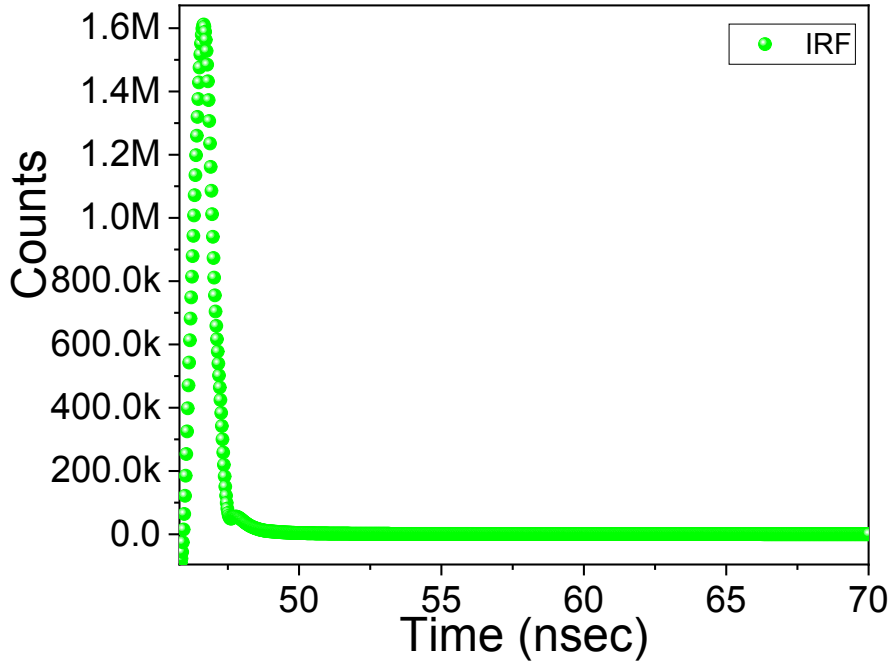

**Fig. S7** TrPL life time IRF spectra.

**Quantum efficiency calculations:** Quantum yield (QY) of N doped CDs-[Cho][Ola] -DES colloidal solutions was calculated using Fluorescein dye as a standard having, QY = 0.79 (79%). We prepared 0.1M NaOH solution of dye to measure the QY and it was calculated using following equation:

$$\phi = \phi_R \times \frac{I}{I_R} \times \frac{A_R}{A} \times \frac{\eta^2}{\eta_R^2}$$

Where,

$\phi, \phi_R$  = Quantum yield of sample and reference respectively,

$I, I_R$  = Emission of the sample and reference respectively,

$A, A_R$  = optical density of the sample and reference respectively,

$\eta^2, \eta_R^2$  = refractive index of the sample and reference respectively.

**Table S1.** Comparison of quantum yields of CDs vis. a vis. method of preparation.

| S.No. | Type of material          | Synthetic route     | Quantum yield | Application                     | Reference/s          |
|-------|---------------------------|---------------------|---------------|---------------------------------|----------------------|
| 1     | DES-N-CDs micelles        | 100°C               | 0.82          | Light harvesting and bioimaging | <b>Present study</b> |
| 2     | N-CDs                     | Microwave @ 160 °C  | 0.93          | pH response                     | 1                    |
| 3     | N-CDs                     | Autoclave at 180 °C | 0.47          | Light harvesting                | 2                    |
| 4     | N-CDs                     | autoclave @ 180 °C  | 0.31          | bioimaging                      | 3                    |
| 5     | N-CDs                     | Autoclave at 200 °C | 0.16          | bioimaging                      | 4                    |
| 6     | N-CDs                     | Microwave @ 180 °C  | 0.14          | bioimaging                      | 5                    |
| 7     | Co-doped CDs              | Autoclave at 200 °C | 0.73          | Light harvesting                | 6                    |
| 8     | S-doped CDs               | 240 °C              | 0.67          | Fe(III) ion detection           | 7                    |
| 9     | Silica functionalised CDs | 240 °C              | 0.47          | bioimaging                      | 8                    |
| 10    | Polyamine doped CDs       | < 200 °C            | 0.42          | chemical sensing                | 9                    |



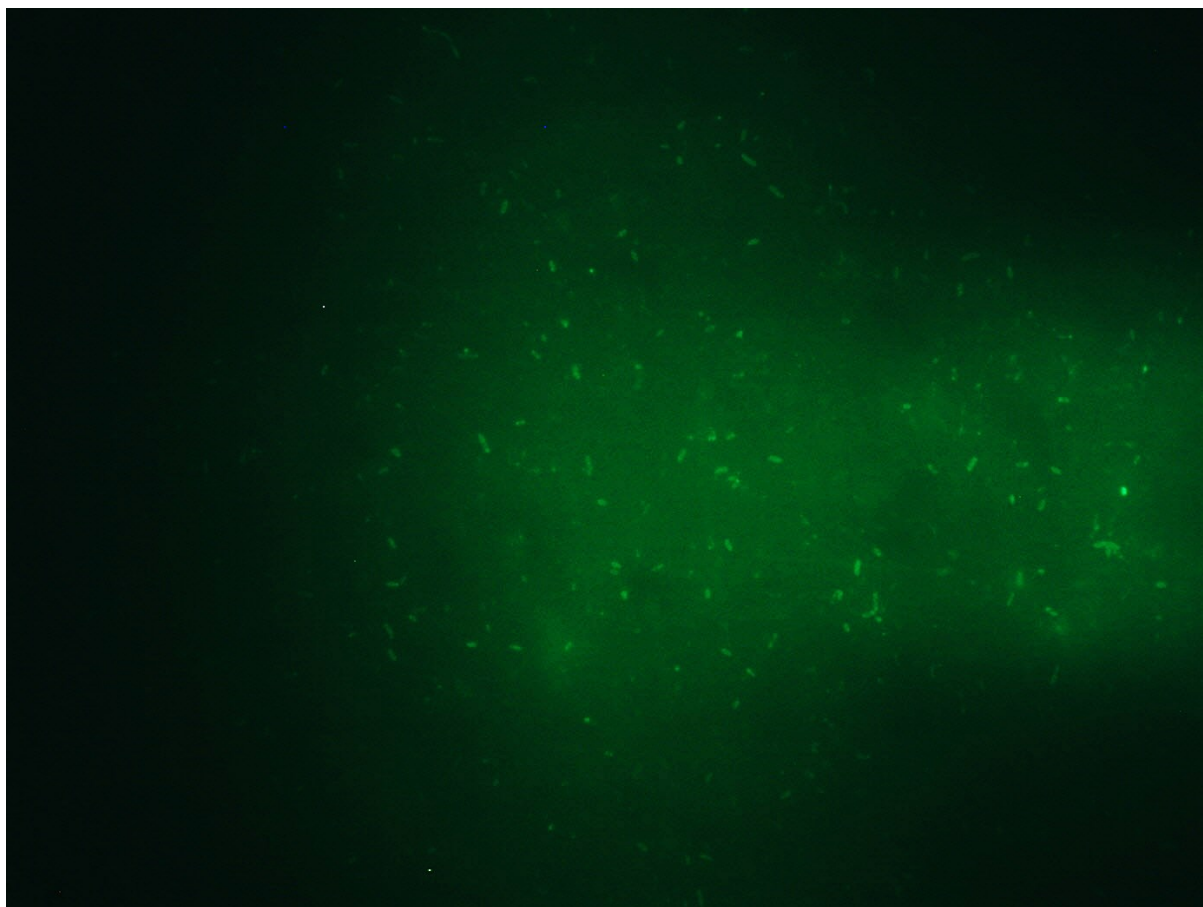

**Fig. S8** Fluorescence microscopic images of *Escherichia coli* with the N-doped carbon dots under and through green filter.

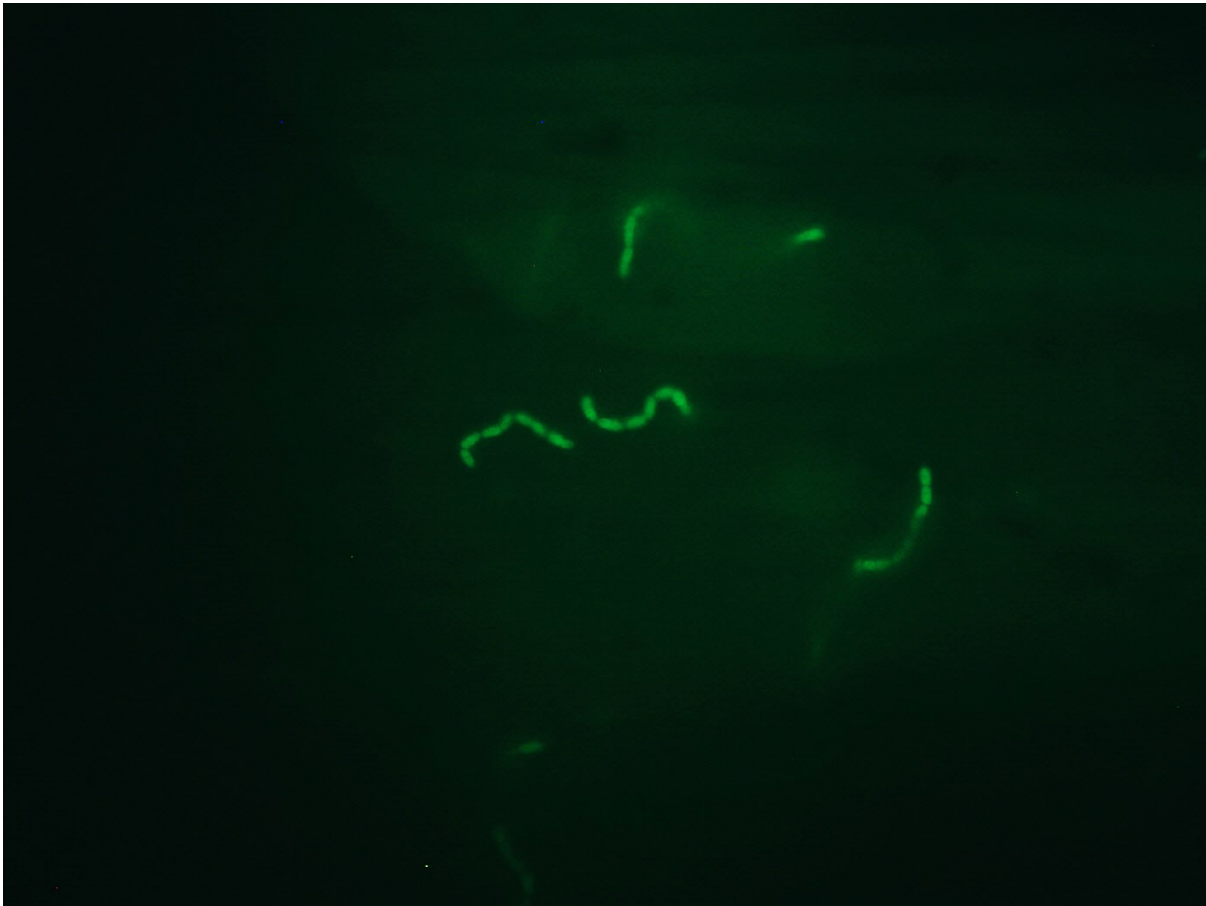

**Fig. S9** Fluorescence microscopic images of *Bacillus cereus*, labeled with the N-doped carbon dots under and through green filter.

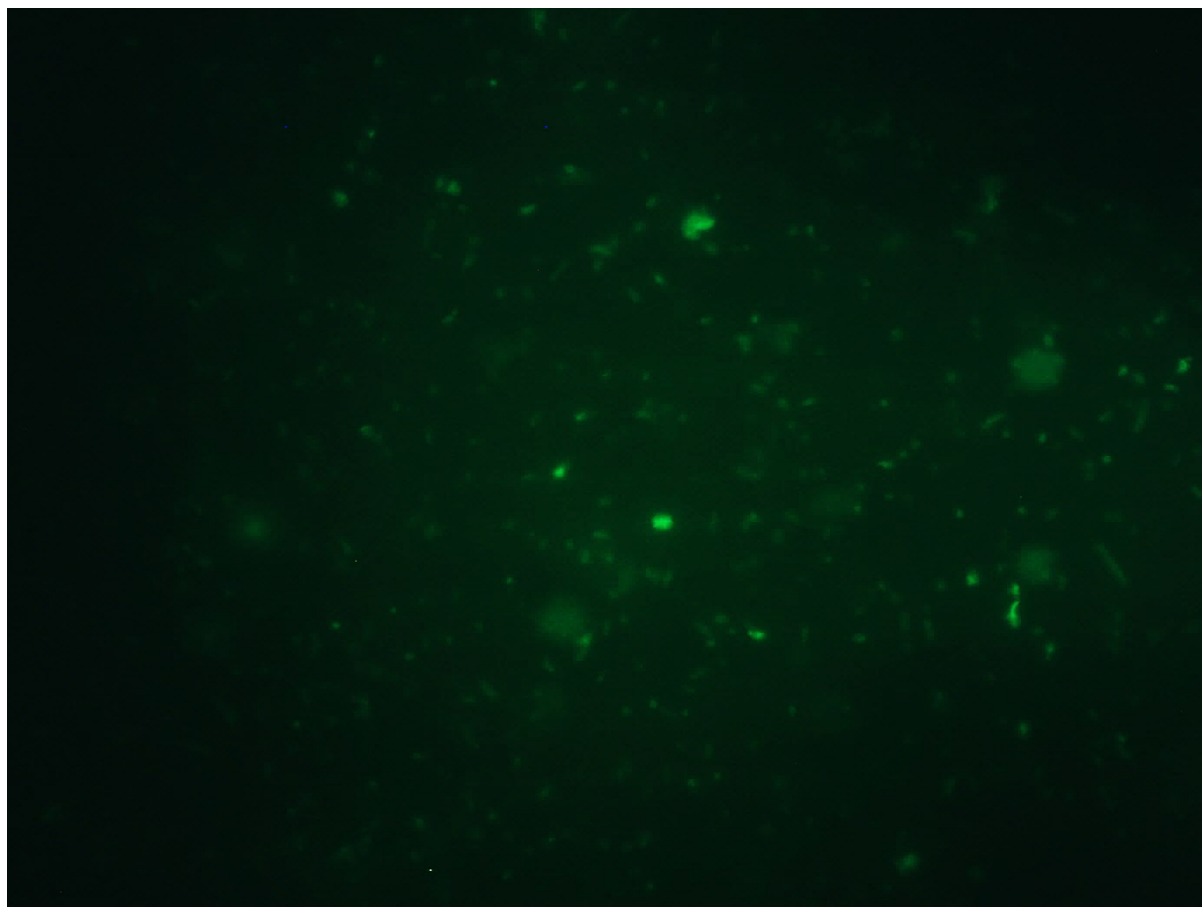

**Fig. S10** Fluorescence microscopic images of *Vibrio owensii*, labeled with the N-doped carbon dots under and through green filter.

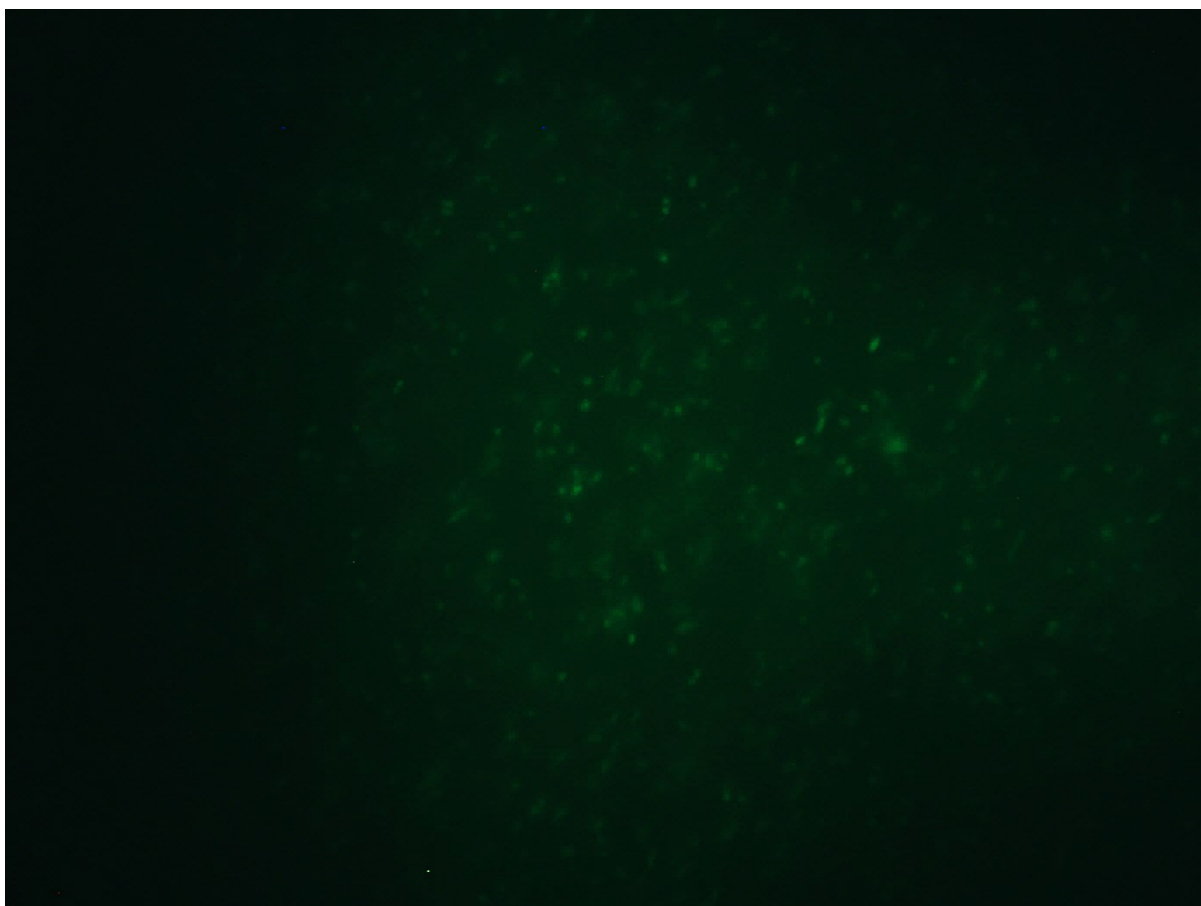

**Fig. S11** Fluorescence microscopic images of *Vibrio alginolyticus* of OD<sub>600</sub> 0.6, labeled with the N-doped carbon dots under and through green filter.

#### References:

1. C. Zheng, X. An and J. Gong, *RSC Adv.*, 2015, **5**, 32319–32322.
2. M. Li, C. Yu, C. Hu, W. Yang, C. Zhao, S. Wang, M. Zhang, J. Zhao, X. Wang, J. Qiu, *Chem. Eng. J.*, 2017, **320**, 570-575.
3. H. Zhang, Y. Chen, M. Liang, L. Xu, S. Qi, H. Chen, and X. Chen, *Anal. Chem.* 2014, **86**, 19, 9846–9852.
4. Y. Song, C. Zhu, J. Song, H. Li, D. Du, and Y. Lin, *ACS Appl. Mater. Interfaces* 2017, **9**, 8, 7399–7405

5. T. N. J. I. Edisona, R. Atchudana, M. G. Sethuraman, J. -J. Shima and Y. R. Leea, *J. Photochem. Photobiol. B*, 2016, **161**, 154-161.
6. Y. Dong, H. Pang, H. B. Yang, C. Guo, J. Shao, Y. Chi, C. M. Li and T. Yu, *Angew. Chem. Int. Ed.* 2013, **52(30)**, 7800–7804.
7. Q. Liang, W. Ma, Y. Shi, Z. Li, X. Yang, *Carbon* 2013, **60**, 421–428.
8. M. J. Krysmann, A. Kelarakis, P. Dallas, E. P. Giannelis, *J. Am. Chem.Soc.* 2012, **134(2)**, 747–750.
9. X. Li, S. Zhang, S. A. Kulinich, Y. Liu, H. Zeng, *Sci Rep.* 2014, **4(1)**, 4976.
